# Supplementary material
Source: publisher site journal article supplement (https://www.dovepress.com/get_supplementary_file.php?f=279901.xlsx)
Supplement: Supplementary file 1 [file get_supplementary_file.php]

## Sheet: Sheet1
Supplemental Table 1. Primer pairs used in the qRT-PCR
	Forward	Reverse
p53	5'-tggccatctacaagaagtcac-3'	5'-gtctgcctgtcttccagatac-3'
Lin28a	5'-agacaggtgctacaactgcg-3'	5'-cagggctgtggatctcttcc-3'
c-Myc	5'-gttggaaaccccgcagacag-3'	5'-atagggctgtacggagtcgt-3'
let-7a	5'-ctcaactggtgtcgtggagtcggcaattcagttgagggaaagac-3'	5'-acactccagctgggctatacaatctactgt-3'
kiss1	5'-cccaggaactcgttaatgcct-3'	5'catggcgacgacctacgag-3'
